# Supplementary material for: Bio-based green solvent for the catalyst free oxidation of arylboronic acids into phenols
Source: Royal Society of Chemistry journal article supplement (doi:10.1039/c5ra18080e), 2015-01-01

## **Supporting Information:**

### **Bio-based green solvent for the catalyst free oxidation of arylboronic acids into phenols**

Surabhi Gupta,<sup>a#</sup> Priyanka Chaudhary,<sup>a#</sup> Lavudi Seva,<sup>b</sup> Shahulhameed Sabiah<sup>b</sup> and Jeyakumar Kandasamy<sup>a\*</sup>

<sup>a</sup>Department of chemistry, Indian Institute of Technology (BHU), Varanasi, Uttar Pradesh-221005; Email: [jeyakumar.chy@iitbhu.ac.in](mailto:jeyakumar.chy@iitbhu.ac.in). <sup>b</sup>Department of chemistry, Pondicherry University, Pondicherry-605014.

<sup>#</sup>Both authors contributed equally to this work

#### **Experimental section:**

All reactions were performed under open air atmosphere at room temperature (~30°C). Solvents and chemicals were purchased from commercial sources and used without further purifications. The NMR spectra were recorded on a Bruker Avance 400 MHz NMR spectrometer and JEOL 300 MHz NMR Spectrometer. The column chromatography was performed on silica gel (60-120 mesh) using a mixture of ethylacetate and hexane as eluent. Thin layer chromatography was performed using pre-coated plates obtained from E. Merck (TLC silica gel 60 F254). The proton NMR was recorded for the phenols and compared with literature reports.<sup>1-4</sup>

#### **A general experimental procedure for the oxidation reaction:**

To a stirred solution of aryl boronic acid (or) aliphatic boronic acid (0.5 mmol) in lactic acid (or) acetic acid (1.0 mL) was added 1.0 equivalent of 30% aqueous hydrogen peroxide at room temperature and the progress of the reaction was monitored by TLC. *In case of acetic acid*, after completion of the reaction (as seen by TLC), solvent was evaporated to dryness and the residue was subjected to column chromatography to obtain pure phenols. *In case of lactic acid*, after completion, the reaction mixture was diluted with water and extracted with petroleum ether-ethyl acetate mixture (2:1, 5x5mL).<sup>6</sup> The companion organic layer was dried over sodium sulphate (Na<sub>2</sub>SO<sub>4</sub>), evaporated and subjected to chromatography to obtain pure products.

#### **Analytical data for the products:**

**2a:** Phenol was obtained as brown oil (Yield: 45 mg (95%) in both lactic acid and acetic acid).

<sup>1</sup>H NMR (400 MHz, CDCl<sub>3</sub>)<sup>1</sup>: δ 7.27 (m, 2H), 6.97 (m, 1H), 6.87 (m, 2H), 6.16 (br, 1H).

**2b:** 1-Naphthol was obtained as a white solid (Yield: 67 mg (93%) in lactic acid; 68 mg (95%) in acetic acid). <sup>1</sup>H NMR (400 MHz, CDCl<sub>3</sub>)<sup>1</sup>: δ 8.20 (m, 1H), 7.80 (m, 1H), 7.57-7.42 (m, 3H),

7.32 (t, *J* = 7.8 Hz, 1H), 6.82 (d, *J* = 7.3 Hz, 1H), 5.40 (br, OH).

**2c:** 2-Naphthol was obtained as a white solid (Yield: 68 mg (94%) in lactic acid; 69 mg (96%) in acetic acid).  $^1\text{H}$  NMR (400 MHz,  $\text{CDCl}_3$ )<sup>1</sup>:  $\delta$  7.77 (t,  $J$  = 9.2 Hz, 2H), 7.67 (d,  $J$  = 8.2 Hz, 1H), 7.44 (t,  $J$  = 7.3 Hz, 1H), 7.35 (t,  $J$  = 8.2 Hz, 1H), 7.17-7.08 (m, 2H).

**2d:** 4-Methoxyphenol was obtained as colorless oil. (Yield: 56 mg (90%) in lactic acid; 59 mg (95%) in acetic acid).  $^1\text{H}$  NMR (400 MHz,  $\text{CDCl}_3$ )<sup>1</sup>:  $\delta$  6.82-6.75 (m, 4H), 3.77 (s, 3H).

**2e:** 4-Methylphenol was obtained as colorless oil (Yield: 51 mg (95%) in lactic acid; 50 mg (93%) in acetic acid).  $^1\text{H}$  NMR (400 MHz,  $\text{CDCl}_3$ )<sup>1</sup>:  $\delta$  7.05 (d,  $J$  = 8.0 Hz, 2H), 6.81 (d,  $J$  = 8.2 Hz, 2H), 2.31 (s, 3H).

**2f:** 2-Methylphenol was obtained as colorless oil (Yield: 51 mg (95%) in lactic acid; 51 mg (95%) in acetic acid).  $^1\text{H}$  NMR (400 MHz,  $\text{CDCl}_3$ )<sup>2</sup>:  $\delta$  7.27 (m, 2H), 7.10-6.85 (m, 2H), 5.80 (br, OH), 2.42 (3H, s).

**2g:** 4-Ethylphenol was obtained as a white solid (Yield: 57 mg (93%) in lactic acid; 58 mg (95%) in acetic acid).  $^1\text{H}$  NMR (400 MHz,  $\text{CDCl}_3$ )<sup>3</sup>:  $\delta$  7.03 (d,  $J$  = 8.4, 2H), 6.73 (d,  $J$  = 8.8 Hz, 2H), 4.89 (br, OH), 2.58 (q,  $J$  = 7.59 Hz, 2H), 1.22 (t,  $J$  = 7.6 Hz, 3H).

**2h:** 4-tert-Butylphenol was obtained as a colourless solid (Yield: 72 mg (96%) in lactic acid; 70 mg (93%) in acetic acid).  $^1\text{H}$  NMR (400 MHz,  $\text{CDCl}_3$ )<sup>1</sup>:  $\delta$  7.27-7.23 (m, 2 H), 6.79-6.74 (m, 2 H), 4.84 (br, OH), 1.29 (s, 9 H).

**2i:** 4-Phenylphenol was obtained as a white solid (Yield: 79 mg (93%) in lactic acid; 83 mg (97%) in acetic acid).  $^1\text{H}$  NMR (400 MHz,  $\text{CDCl}_3$ )<sup>2</sup>:  $\delta$  7.56-7.53 (m, 2H), 7.47 (d,  $J$  = 8.4 Hz, 2H), 7.43 (t,  $J$  = 7.6 Hz, 2H), 7.32 (t,  $J$  = 7.4 Hz, 1H), 6.90 (d,  $J$  = 8.8 Hz, 2H), 5.00 (br, OH).

**2j:** 2,4,6-Trimethyl phenol was obtained as a white solid (Yield: 64 mg (94%) in both lactic acid and acetic acid).  $^1\text{H}$ NMR (400 MHz,  $\text{CDCl}_3$ )<sup>4</sup>:  $\delta$  6.79 (s, 2H), 4.47 (s, 1H), 2.22 (m, 9H).

**2k:** 3-Nitrophenol was obtained as a pale yellow solid (Yield: 63 mg (91%) in lactic acid; 66 mg (95%) in acetic acid).  $^1\text{H}$  NMR (400 MHz,  $\text{CDCl}_3$ )<sup>2</sup>:  $\delta$  7.81-7.78 (m, 1H), 7.72 (t,  $J$  = 2.3 Hz, 1H), 7.41 (t,  $J$  = 8.2 Hz, 1H), 7.21-7.17 (m, 1H), 5.96 (br, OH).

**2l:** 4-Nitrophenol was obtained as a yellow solid (Yield: 64 mg (92%) in lactic acid; 65 mg (94%) in acetic acid).  $^1\text{H}$ NMR (400 MHz,  $\text{CDCl}_3$ ) <sup>1</sup>:  $\delta$  8.19-8.15 (m, 2H), 6.96-6.91 (m, 2H), 6.57 (s, OH).

**2m:** 4-Fluorophenol was obtained as a white solid (Yield: 52 mg (92 %) in both lactic acid and acetic acid).  $^1\text{H}$  NMR (400MHz,  $\text{CDCl}_3$ )<sup>1</sup>:  $\delta$  6.95-6.88 (m, 2H), 6.80-6.75 (m, 2H).

**2n:** 4-Chlorophenol was obtained as a white solid (Yield: 61 mg (95%) in both lactic acid and acetic acid).  $^1\text{H}$  NMR (400MHz,  $\text{CDCl}_3$ )<sup>2</sup>:  $\delta$  7.21-7.17 (m, 2H), 6.79-6.74 (m, 2H), 5.58 (br, OH).

**2o:** 2,4-Dichlorophenol was obtained as a white solid (Yield: 76 mg (93%) in lactic acid; 73 mg (90%) in acetic acid).  $^1\text{H}$  NMR ( $\text{CDCl}_3$ , 400 MHz)<sup>3</sup>:  $\delta$  7.33 (s, 1H), 7.18 (d,  $J=8.0$  Hz, 1H), 6.95 (d, 1H,  $J=8.0$  Hz), 5.57 (br, OH).

**2p:** 4-Bromophenol was obtained as a semisolid (Yield: 81 mg (94%) in lactic acid; 83 mg (96%) in acetic acid).  $^1\text{H}$  NMR (400 MHz,  $\text{CDCl}_3$ )<sup>1</sup>:  $\delta$  7.32 (m, 2H), 6.72 (m, 2H), 5.36 (br, OH).

**2q:** 4-Iodophenol was obtained as a semisolid (Yield: 103 mg (94%) in lactic acid; 100 mg (91%) in acetic acid).  $^1\text{H}$  NMR (400 MHz,  $\text{CDCl}_3$ )<sup>1</sup>:  $\delta$  7.51 (m, 2H), 6.62 (m, 2H), 5.15 (br, OH).

**2r:** 4-Hydroxyphenol was obtained as a white solid (Yield: 52 mg (95%) in both lactic acid and acetic acid).  $^1\text{H}$  NMR (400 MHz,  $\text{CDCl}_3$ )<sup>3</sup>:  $\delta$  6.72 (4H, s), 3.47 (2H, s).

**2s:** 4-Hydroxyacetophenone was obtained as white solid. (Yield: 65mg (95%) in both lactic acid and acetic acid).  $^1\text{H}$  NMR (400 MHz,  $\text{CDCl}_3$ )<sup>1</sup>:  $\delta$  7.91 (d,  $J = 8.6$  Hz, 2H), 6.91 (d,  $J = 8.6$  Hz, 2H), 2.57 (s, 3H).

**2t:** 2-Phenylethanol was obtained as colorless oil (Yield: 57 mg (94%) in lactic acid).  $^1\text{H}$  NMR (300 MHz,  $\text{CDCl}_3$ )<sup>5</sup>:  $\delta$  7.30-7.34 (m, 3H), 7.24 (t,  $J = 7.4$  Hz, 2H), 3.85 (t,  $J = 6.4$  Hz, 2H), 2.87 (t,  $J = 6.4$  Hz, 2H).

**2u:** Cyclohexanol was obtained as colorless oil (Yield: 43 mg (86%) in lactic acid).  $^1\text{H}$  NMR (400 MHz,  $\text{CDCl}_3$ )<sup>5</sup>:  $\delta$  3.61 (m, 1H), 2.00-1.50 (m, 6H), 1.35-1.10 (m, 4H).

## References

1. Xu, J. M.; Wang, X. Y.; Shao, C. W.; Su, D. Y.; Cheng, G. L.; Hu, Y. F. *Org. Lett.* **2010**, *12*, 1964-1967.
2. Zhu, C.; Wang, R.; Falck, J. R. *Org. Lett.* **2012**, *14*, 3494-3497.
3. Zou, Y. Q.; Chen, J. R.; Liu, X. P.; Lu, L. Q.; Davis, R. L.; Jorgensen, K. A.; Xiao, W. J. *Angew. Chem. Int. Ed. Engl.* **2012**, *51*, 784-8.
4. Jiang, M.; Li, Y.; Yang, H.; Zong, R.; Jinb, Y.; Fub H. *RSC Adv.*, **2014**, *4*, 12977–12980.
5. Chatterjee, N.; Chowdhury, H.; Sneh, K.; Goswami, A. *Tetrahedron Lett* **2015**, *56*, 172-174.
6. Yang, J.; Tan, J. N.; Gu, Y. L. *Green Chem* **2012**, *14*, 3304-3317.

## **$^1\text{H}$ NMR Spectrum of Phenols and aliphatic alcohols**

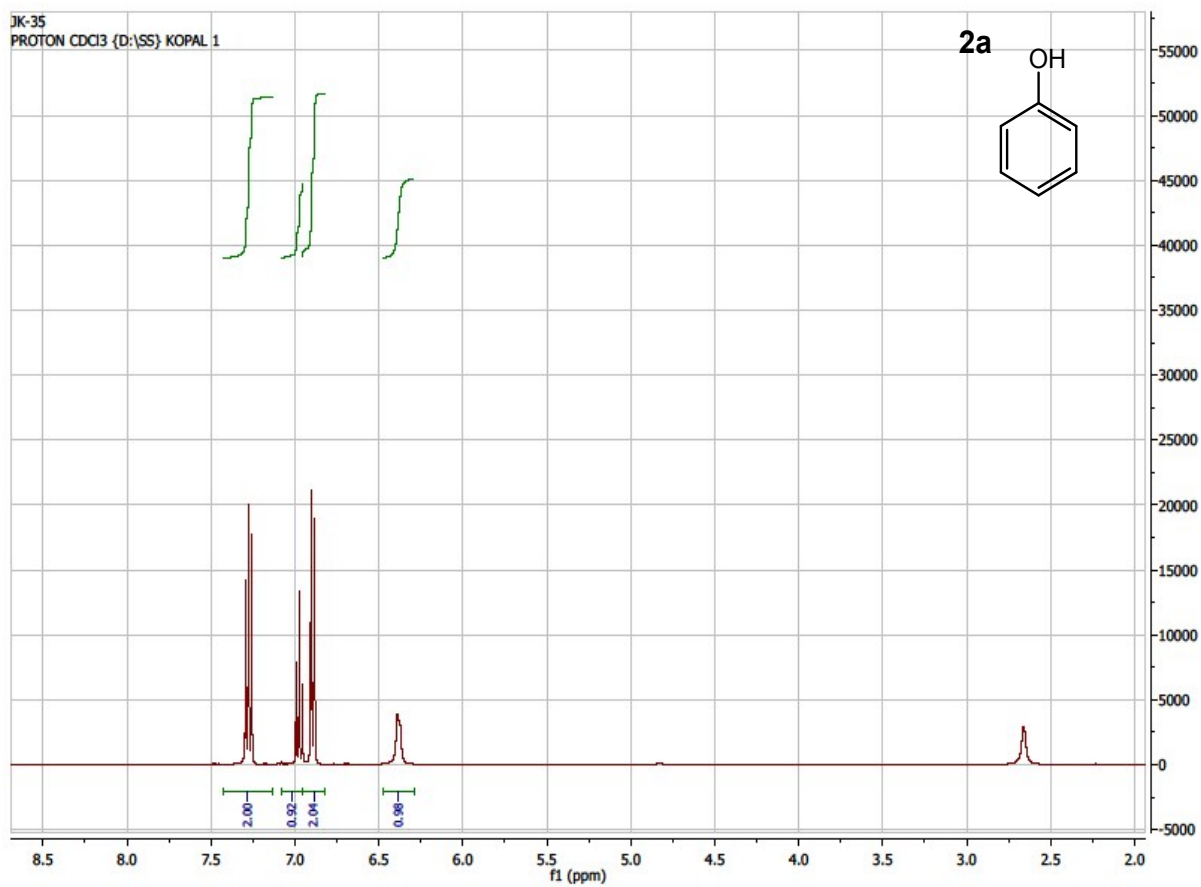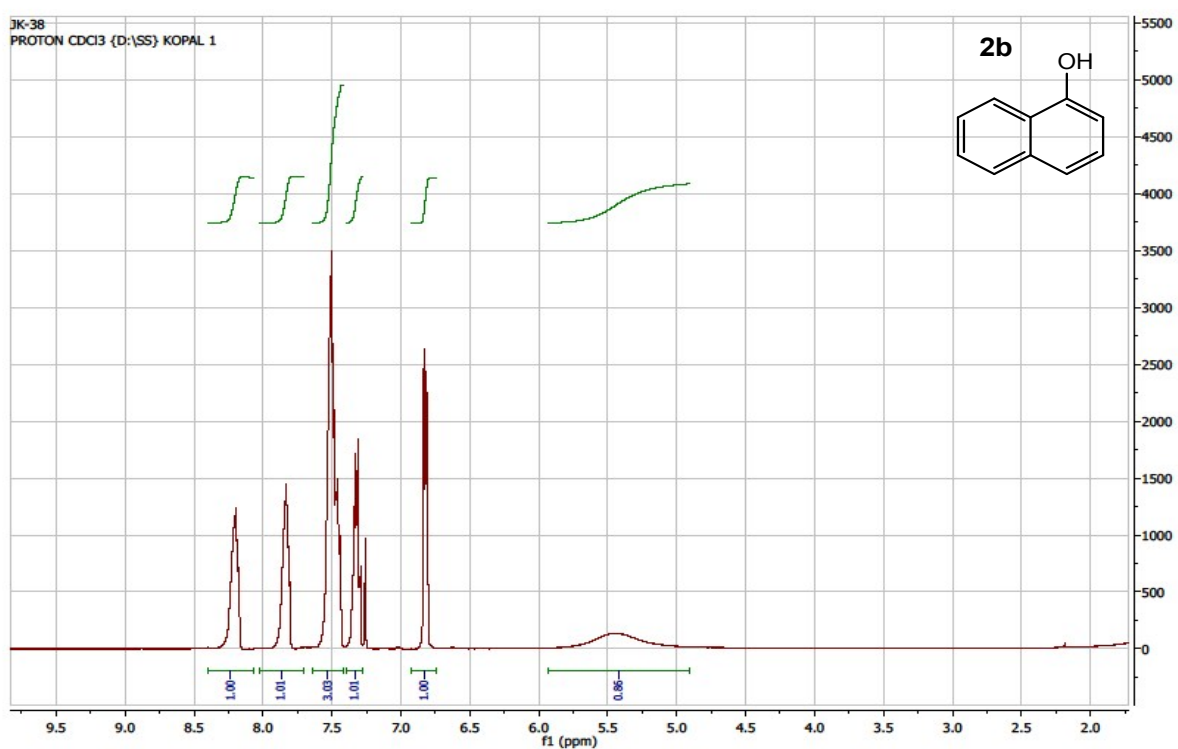

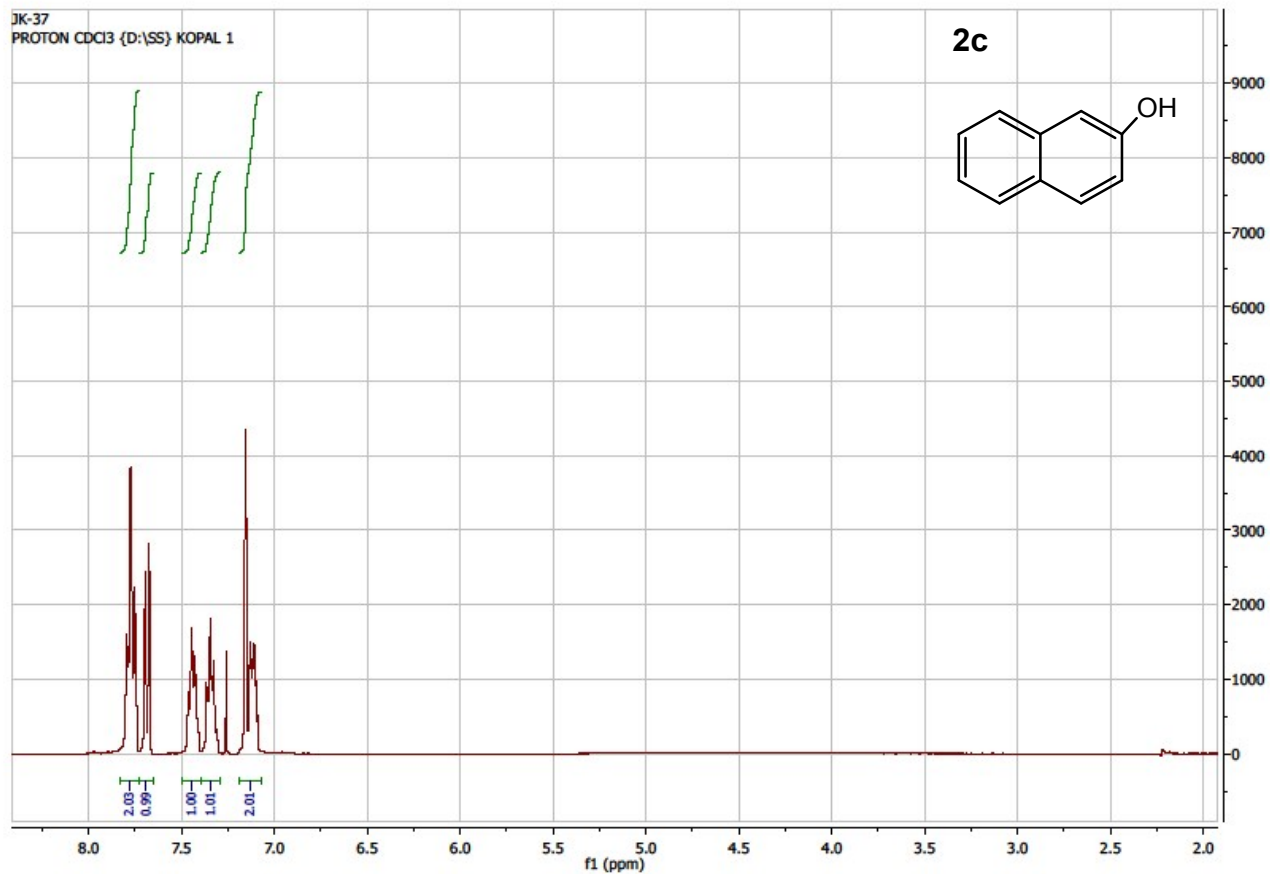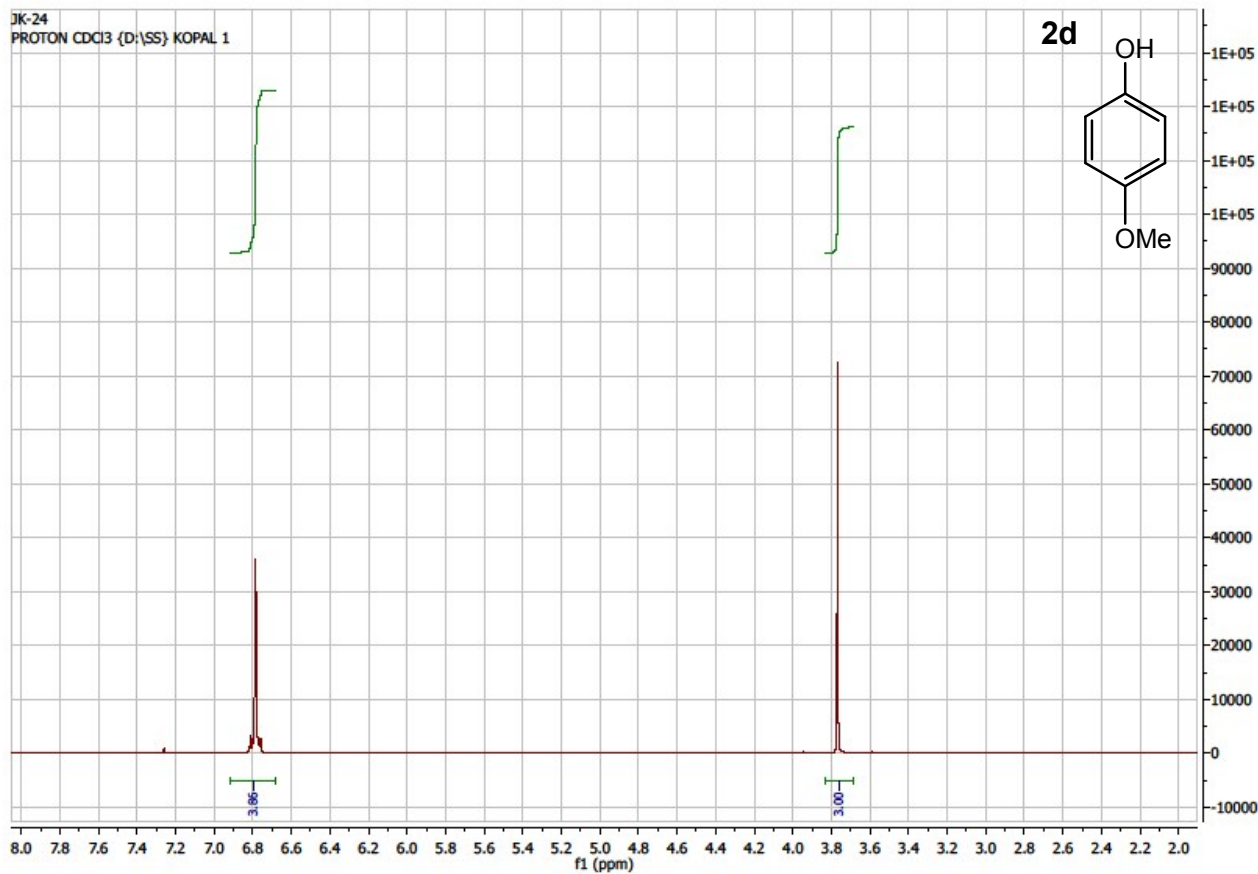

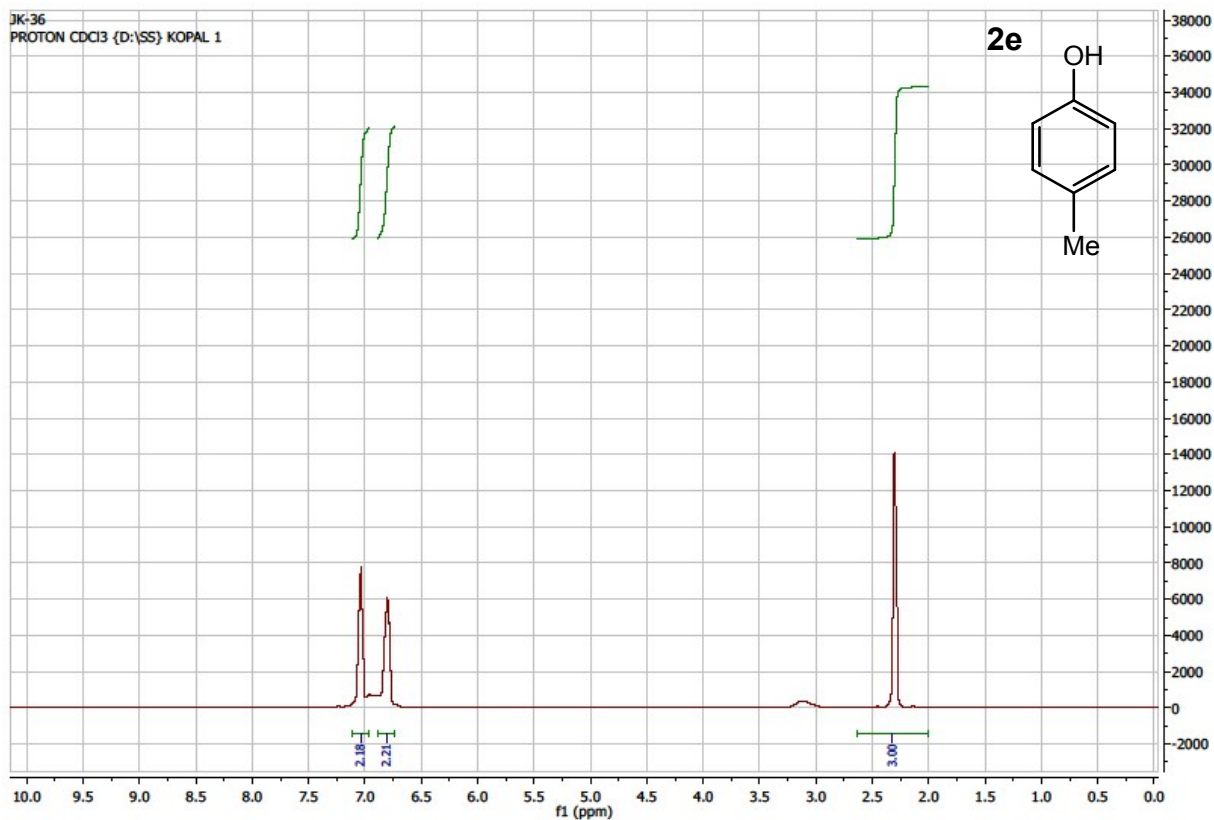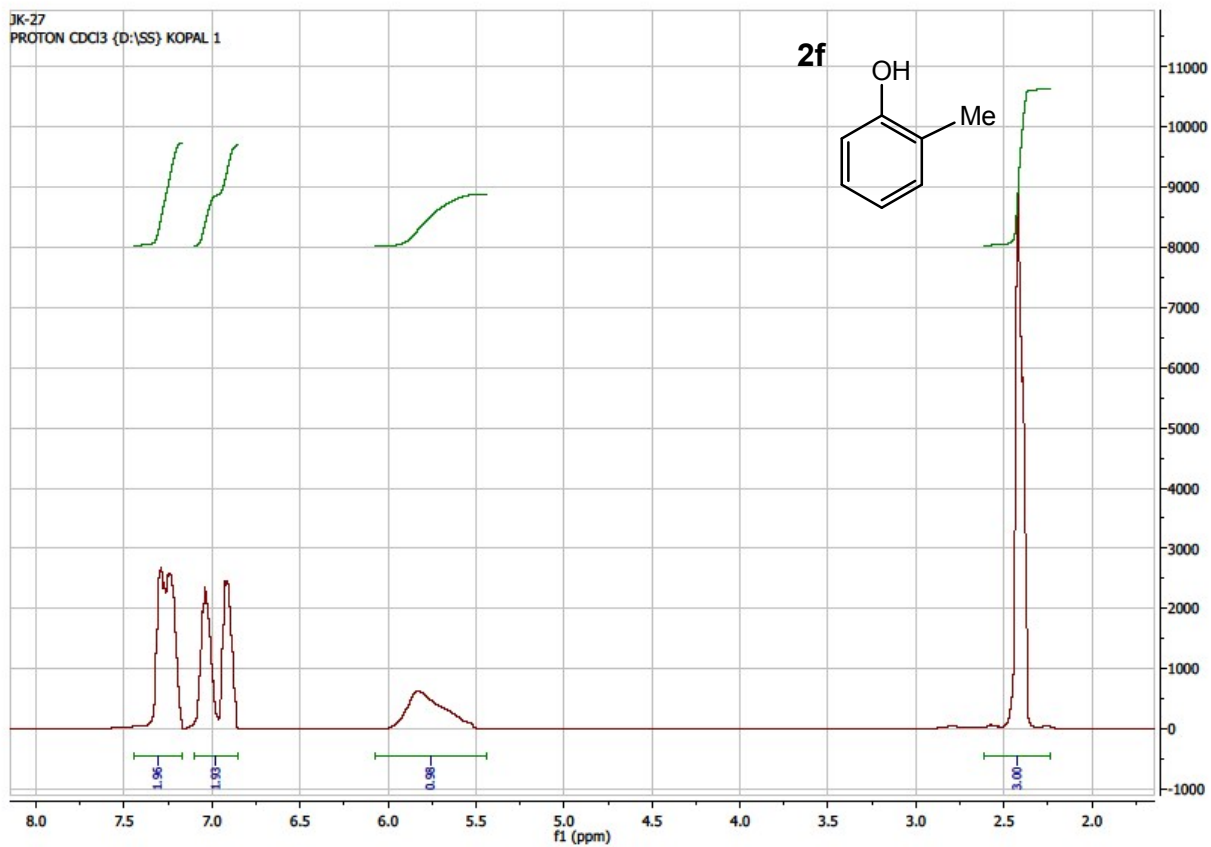

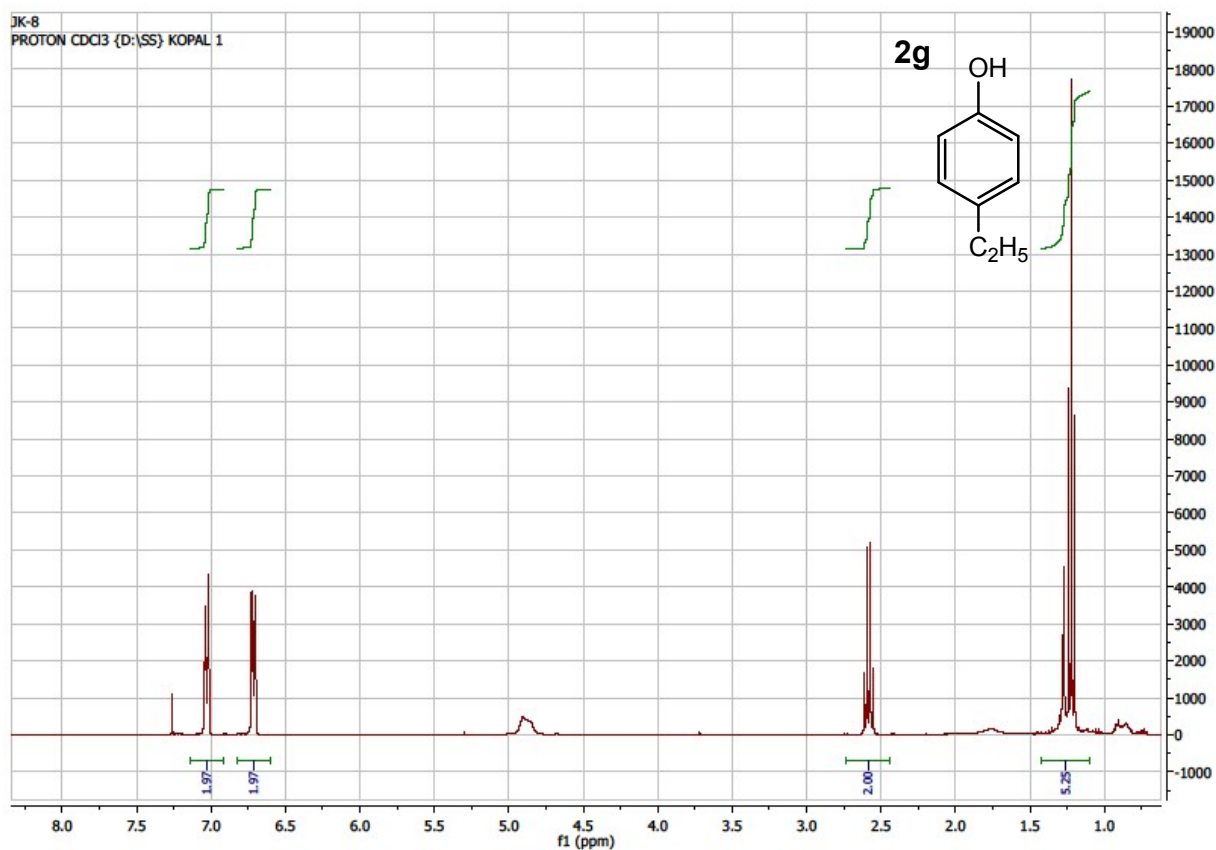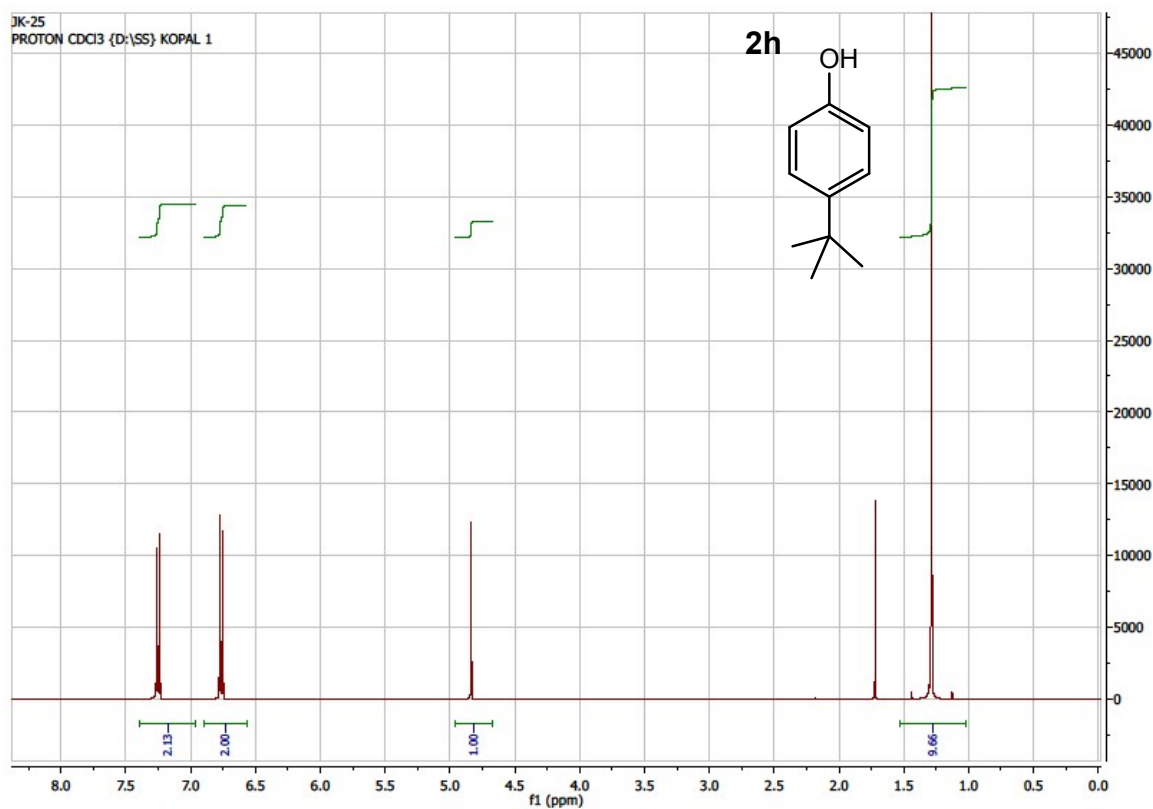

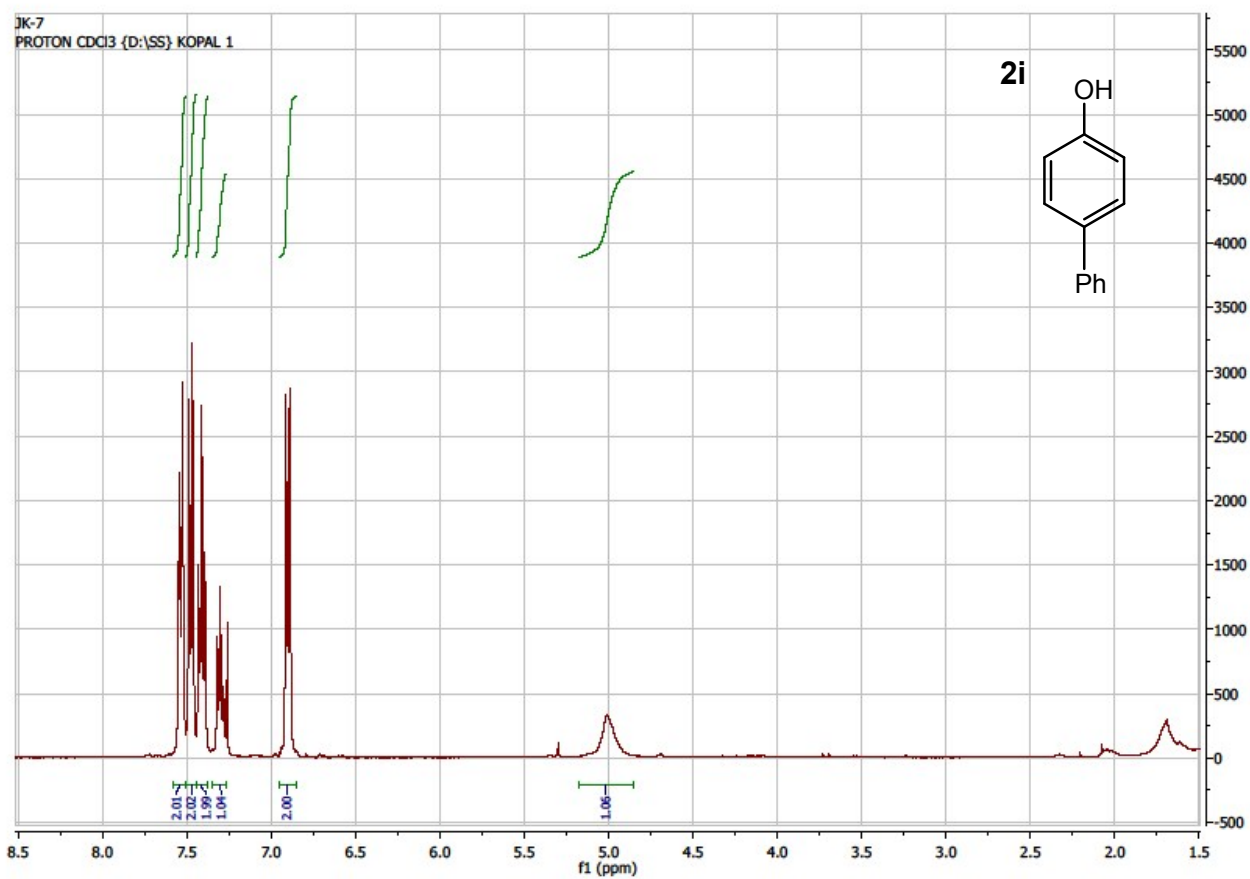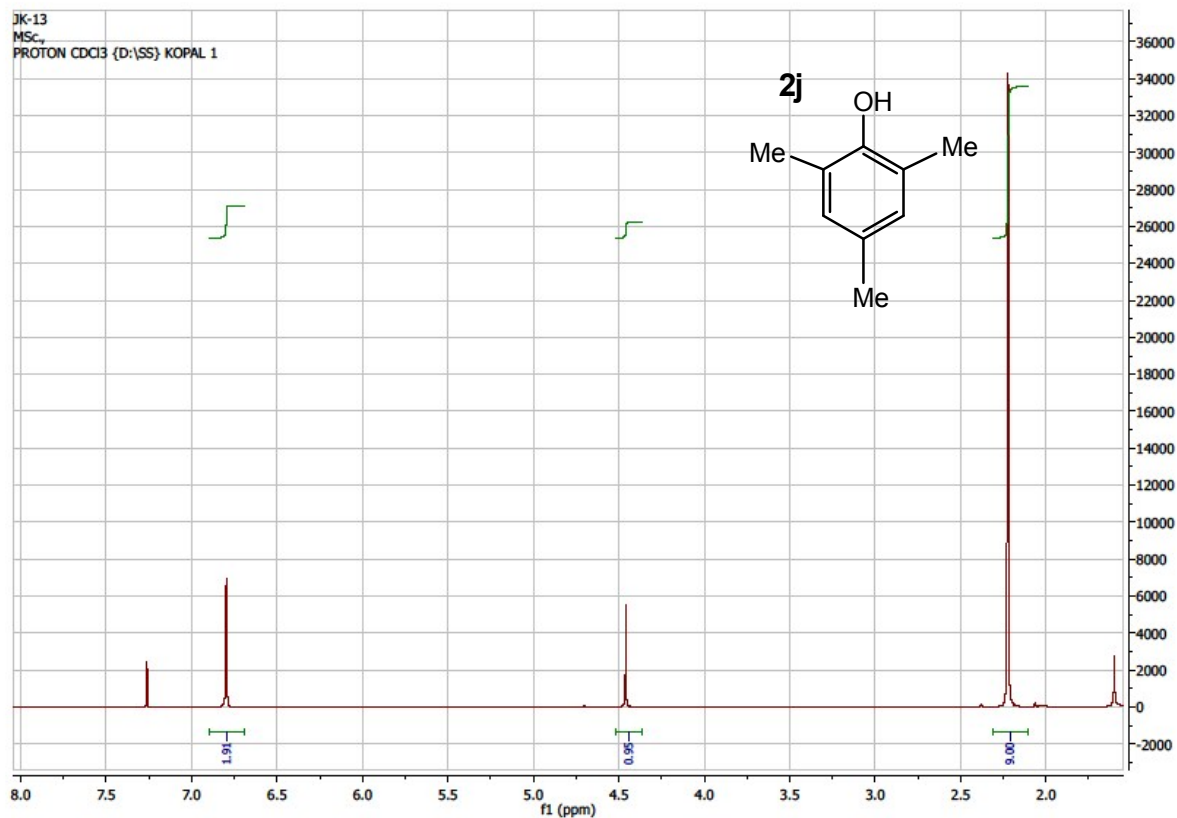



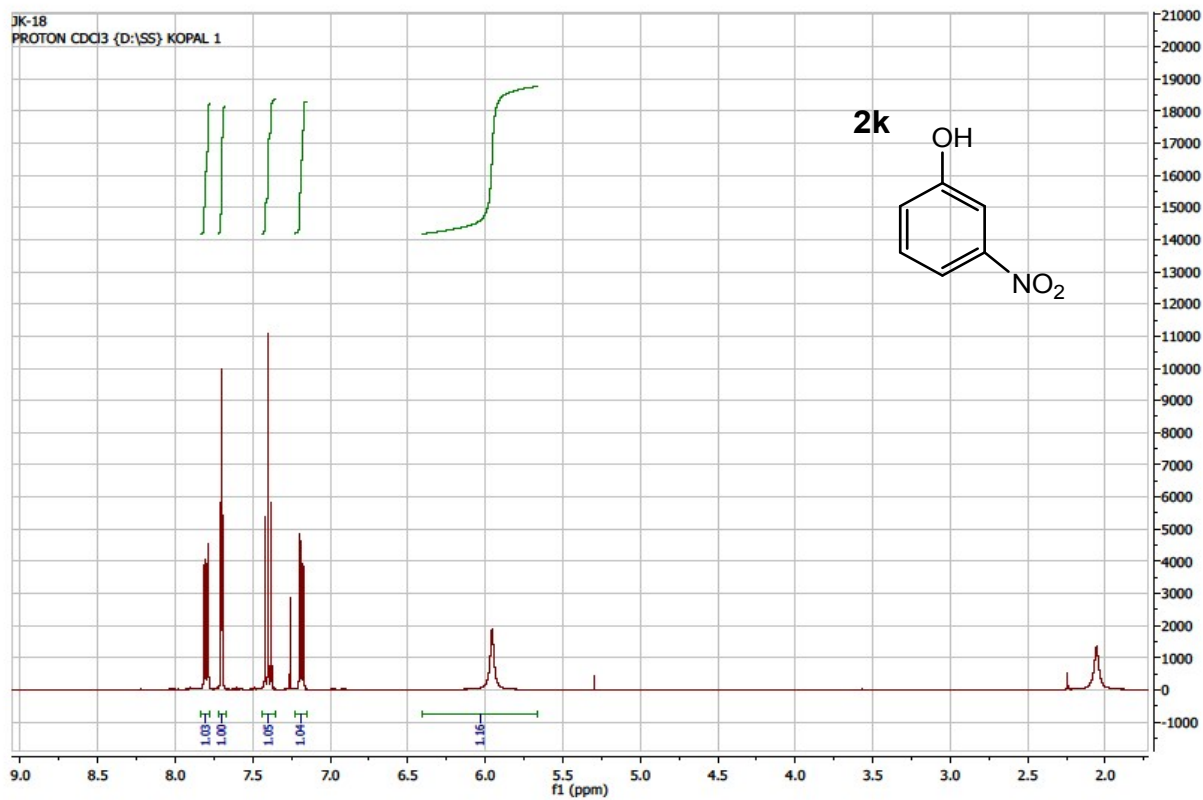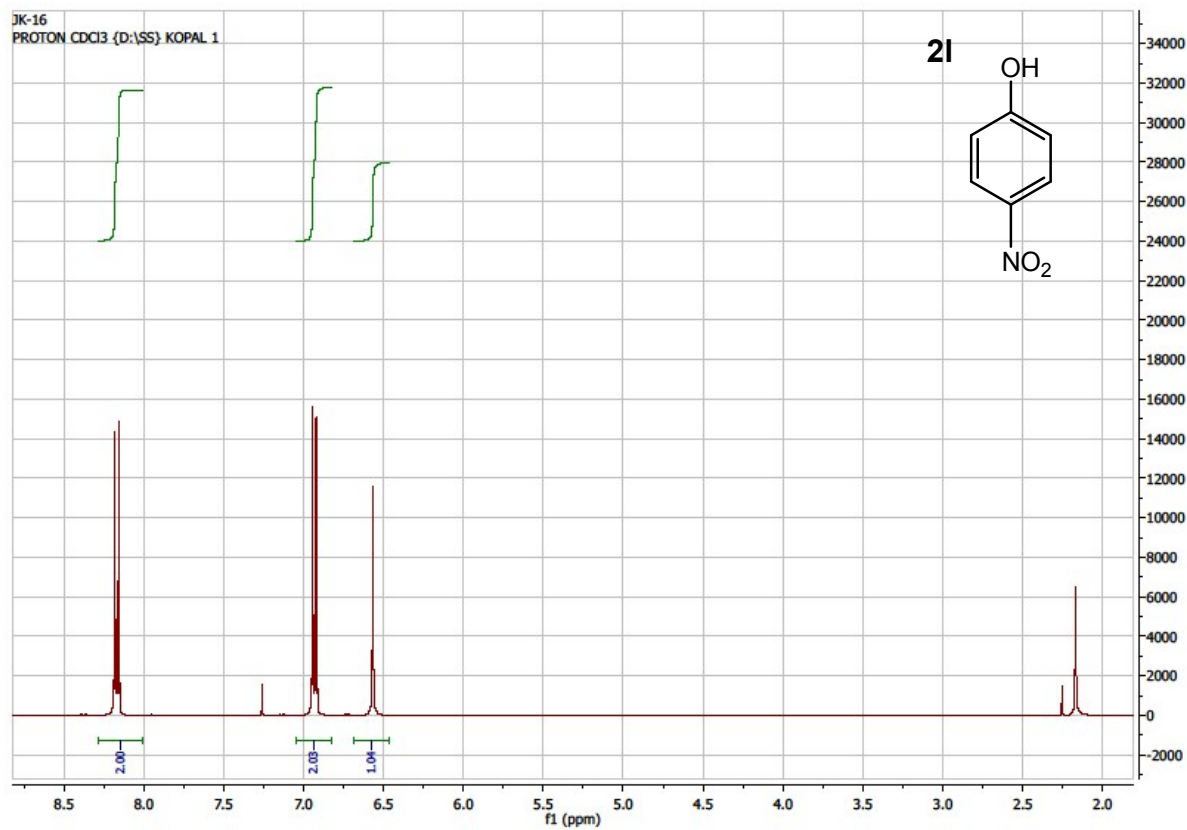

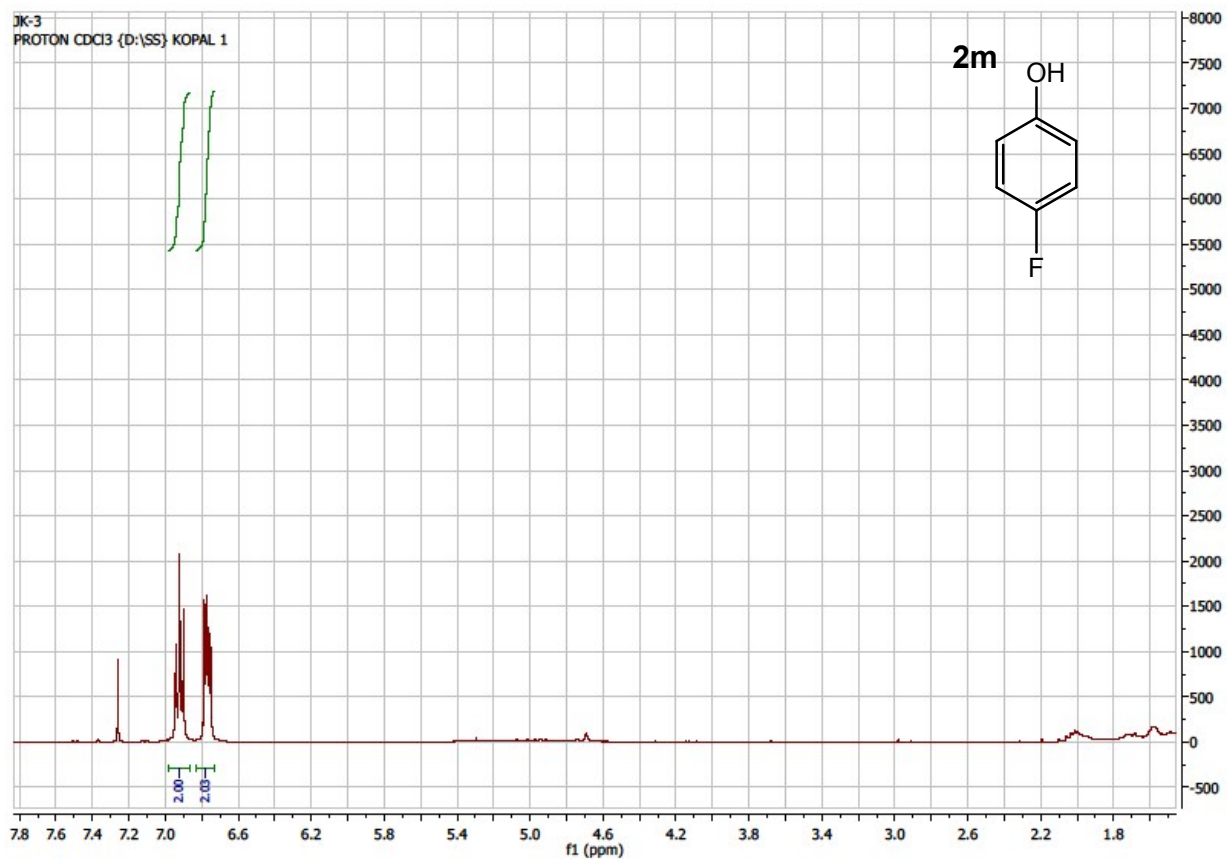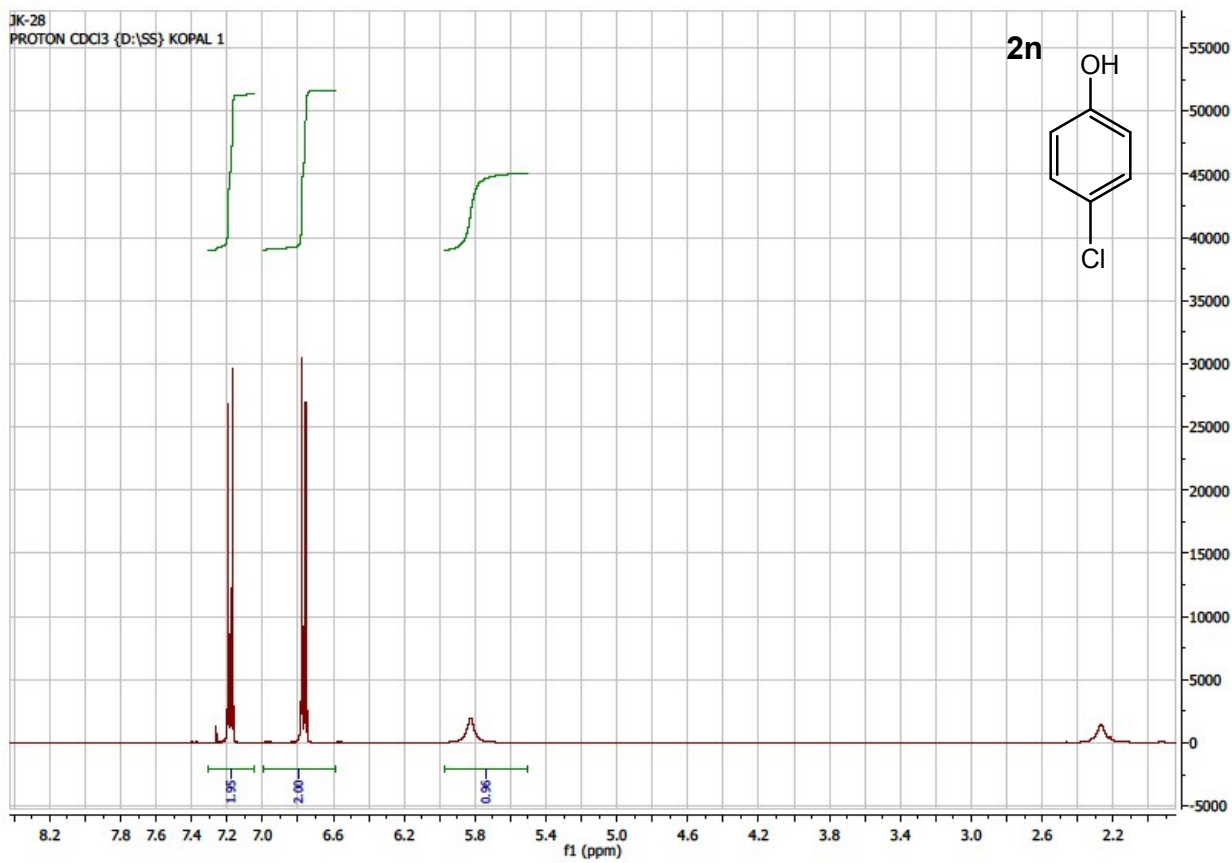

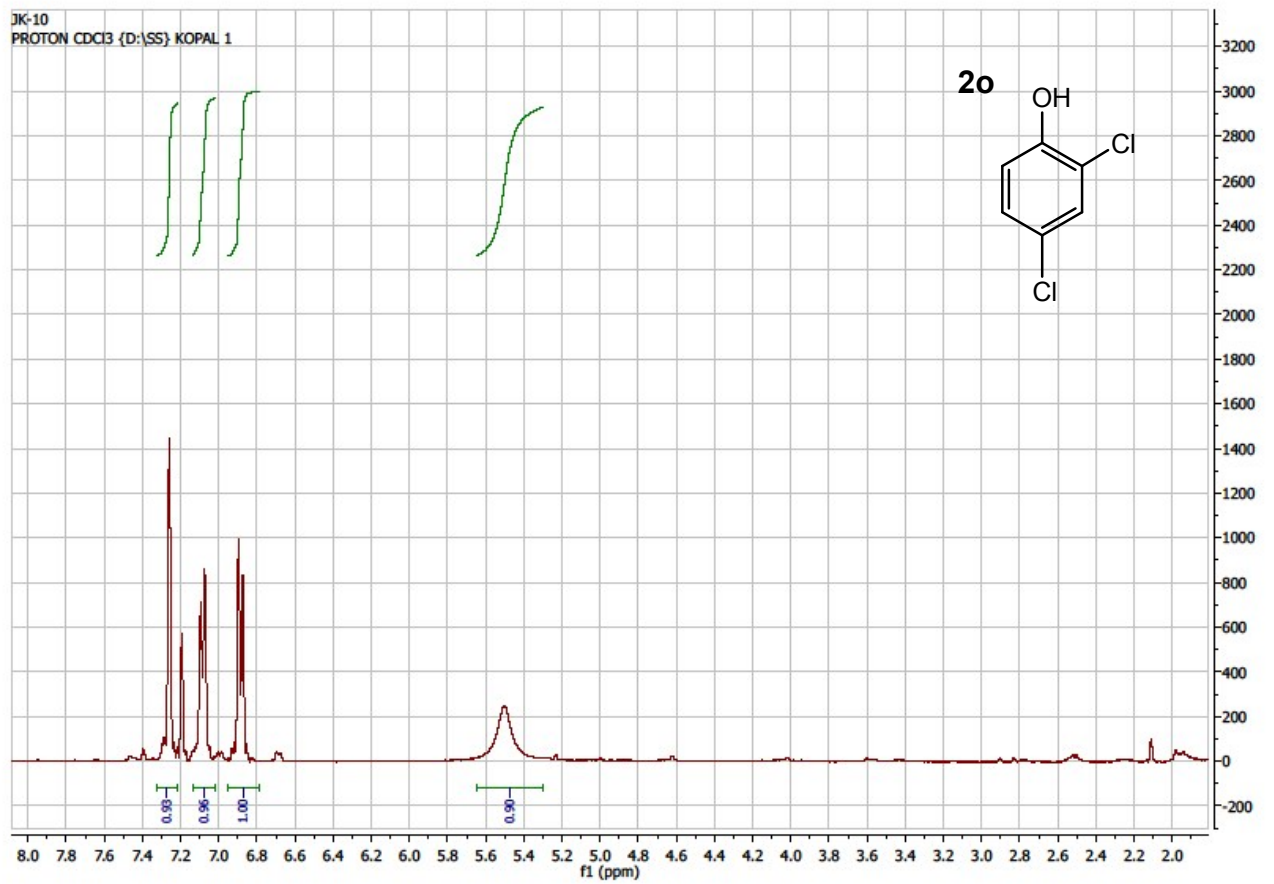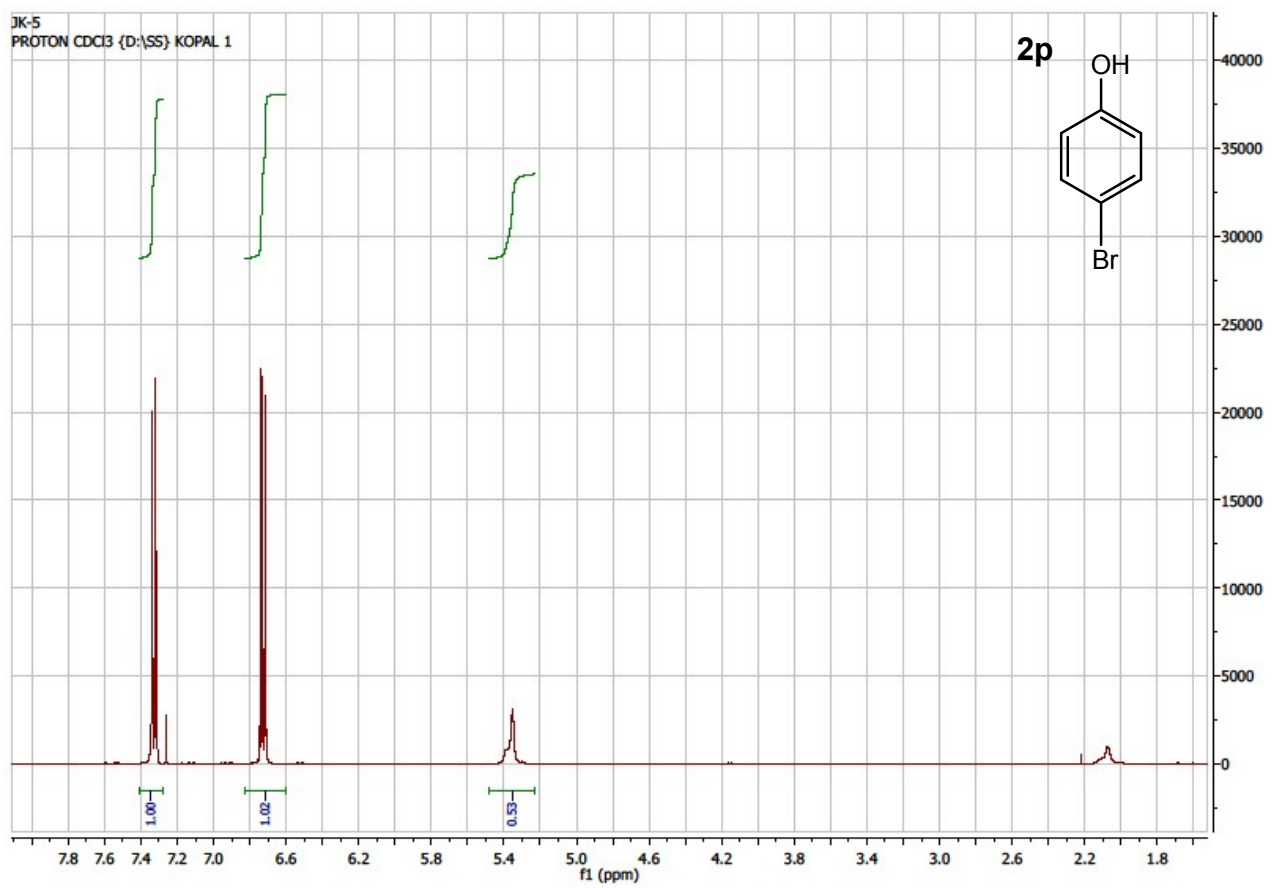

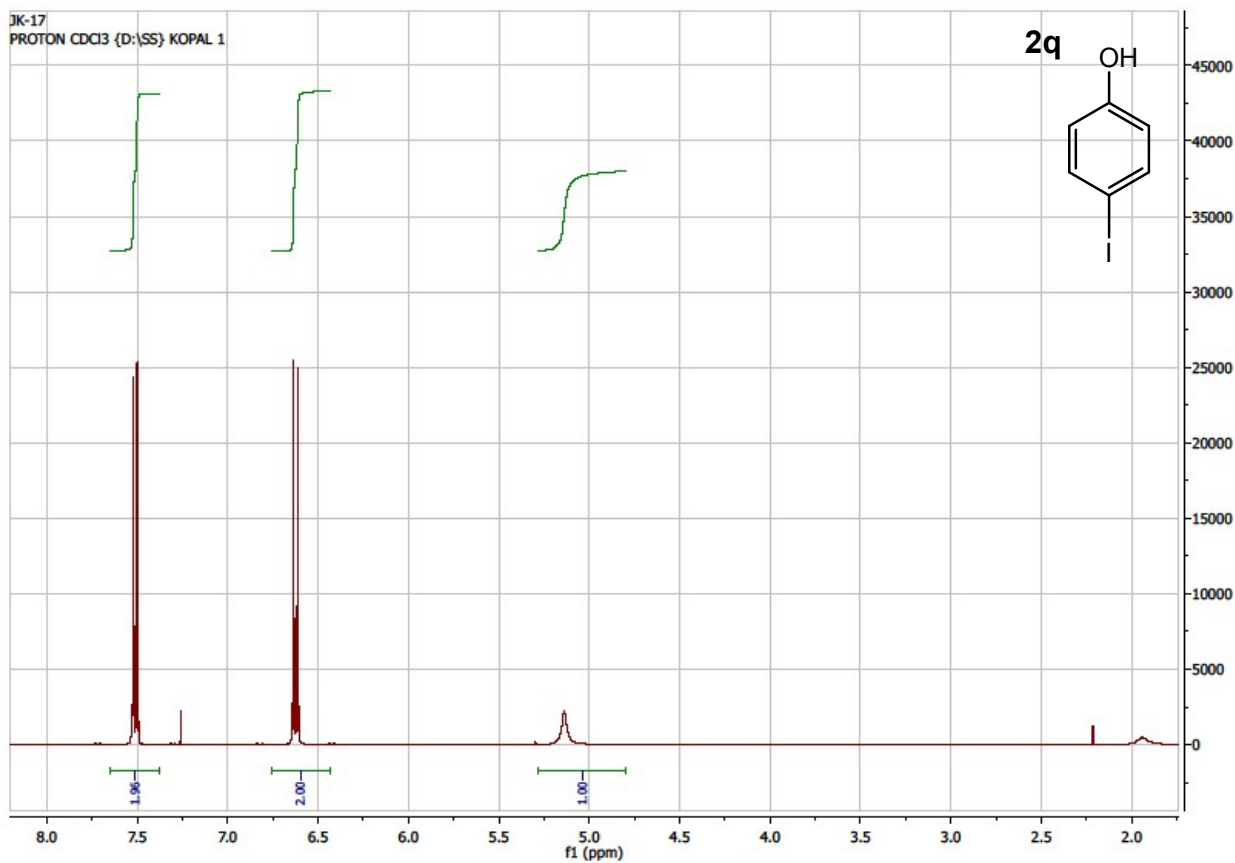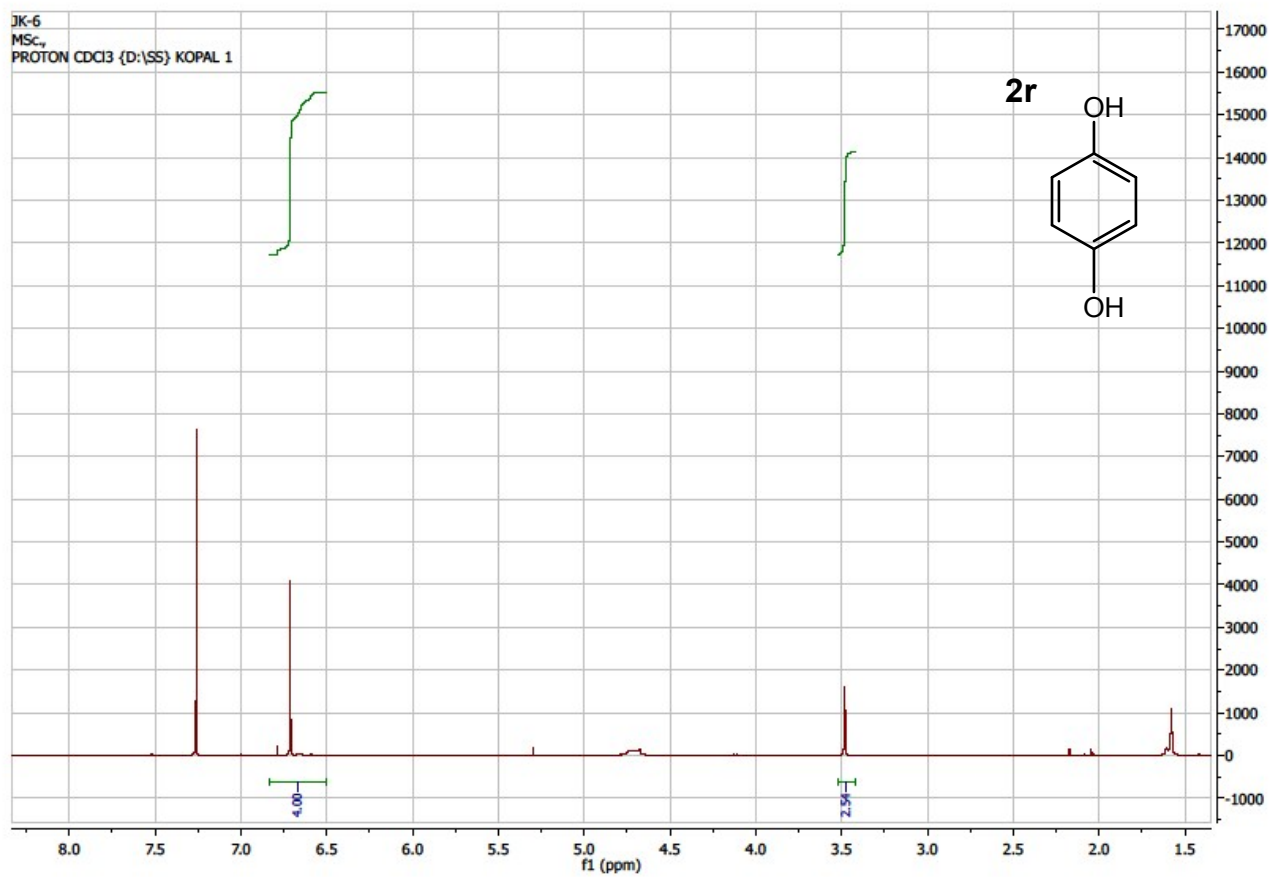

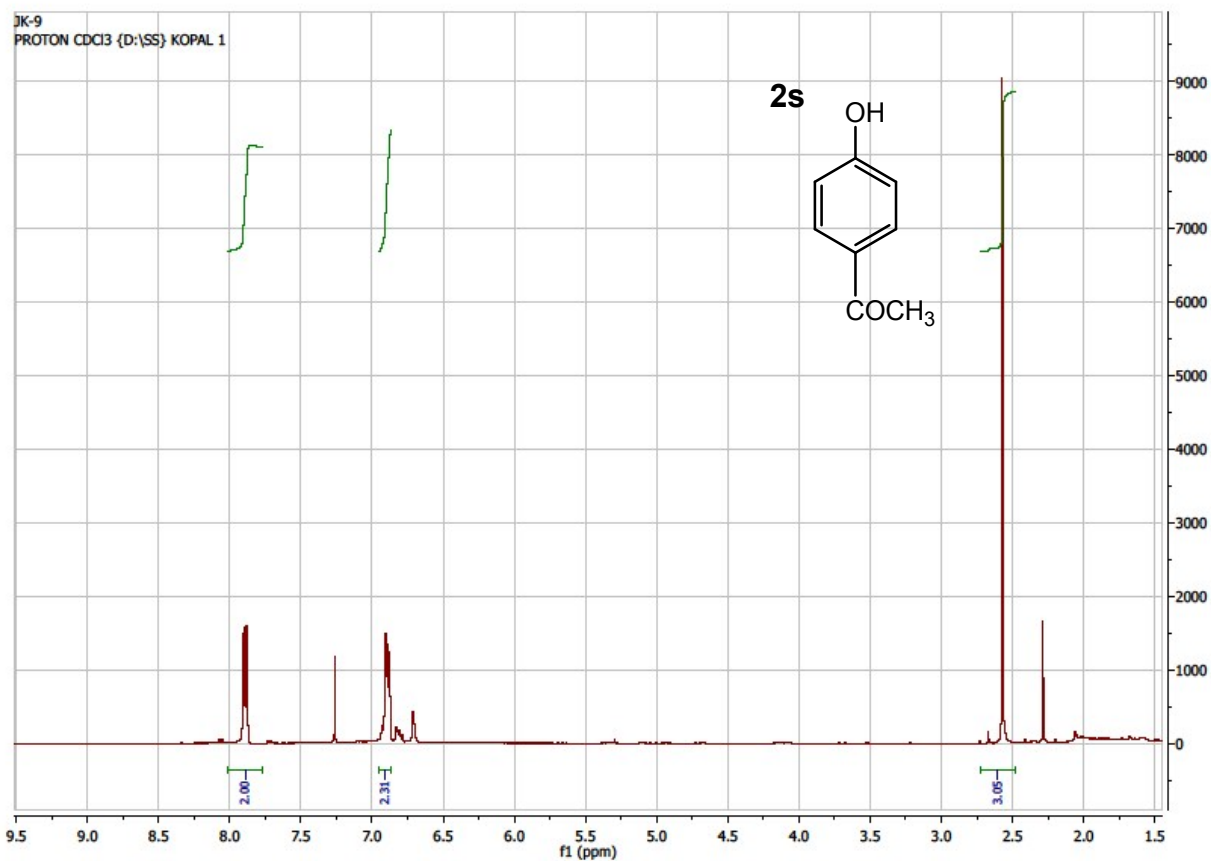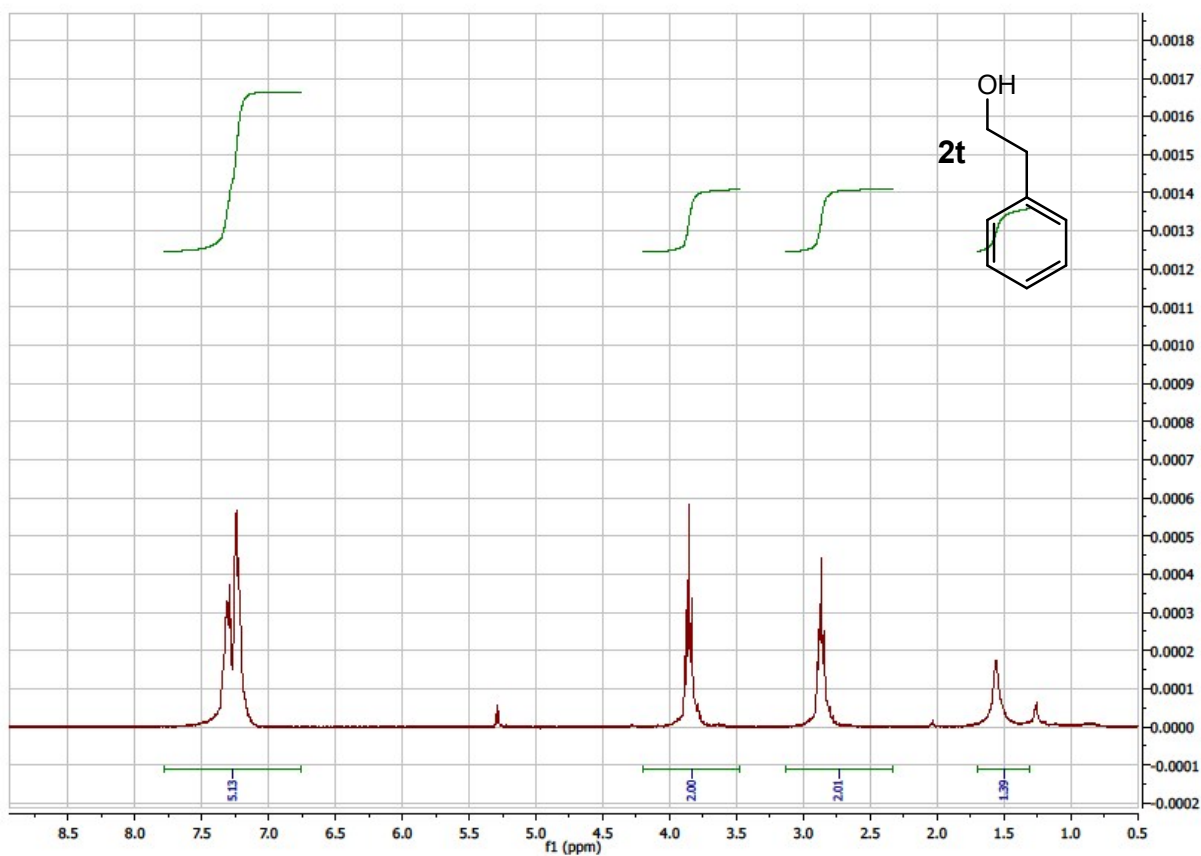

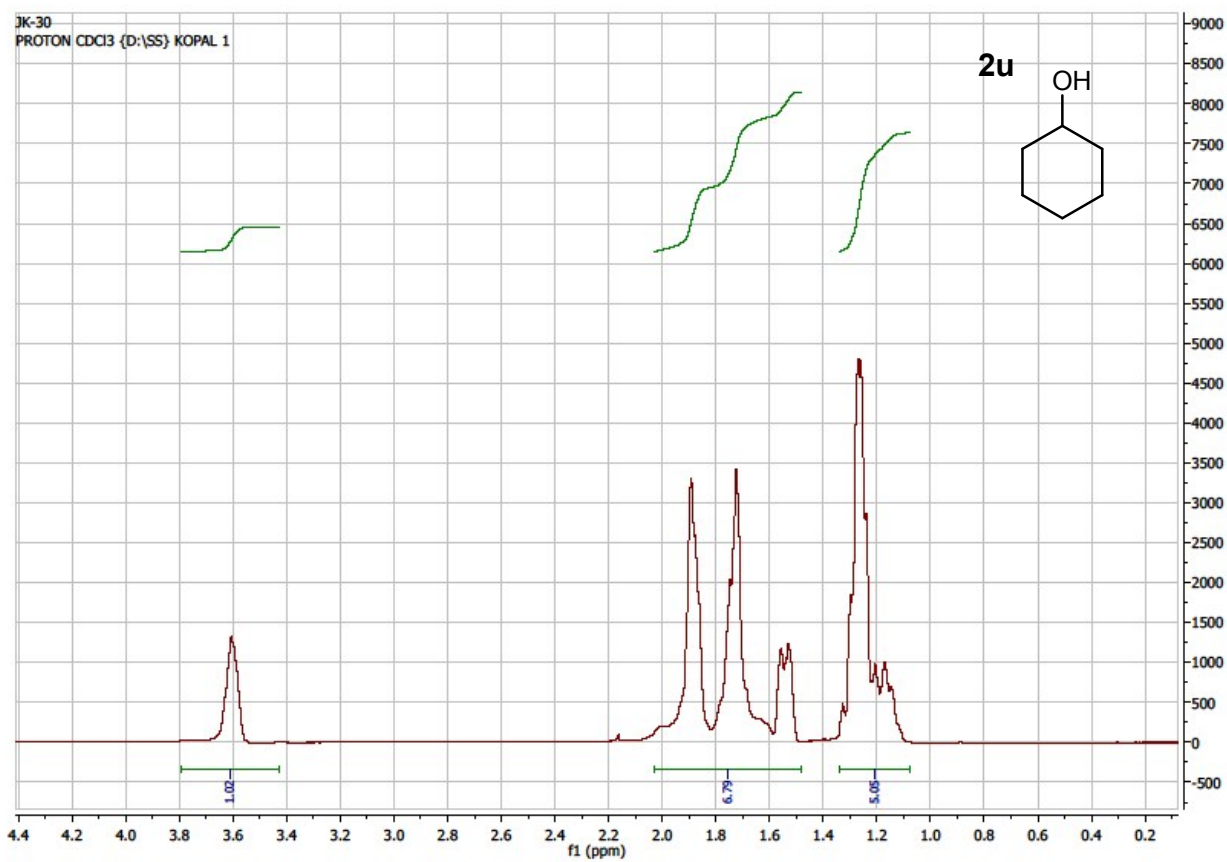

Supplement: c5ra18080e1.pdf [file c5ra18080e1.pdf]
